# Supplementary material for: Multiple paragangliomas: a case report
Source: PubMed Central journal article supplement (PMC7500000; doi:10.1186/s12920-020-00789-8), 2020-09-18
Supplement: 12920_2020_789_MOESM1_ESM.pdf [file 12920_2020_789_MOESM1_ESM.pdf]

**Immunohistochemical staining of SDH subunits in carotid and vagal paragangliomas**

|                   | <b>SDHA</b>                                                                                         | <b>SDHB</b>                                                                                              | <b>SDHC</b>                                                                                           | <b>SDHD</b>                                                                                                  |
|-------------------|-----------------------------------------------------------------------------------------------------|----------------------------------------------------------------------------------------------------------|-------------------------------------------------------------------------------------------------------|--------------------------------------------------------------------------------------------------------------|
| <b>Left CPGL</b>  | 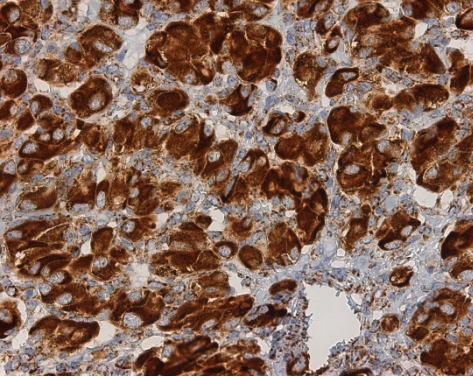 <p>Positive</p>   |  <p>Weak diffuse</p>   |  <p>Positive</p>   |  <p>Positive (weak)</p>   |
| <b>Right CPGL</b> |  <p>Positive</p>   |  <p>Weak diffuse</p>   |  <p>Positive</p>   |  <p>Positive (weak)</p>   |
| <b>Right VPGL</b> |  <p>Positive</p> |  <p>Weak diffuse</p> |  <p>Positive</p> |  <p>Positive (weak)</p> |
